# Supplementary material for: circSPG21 protects against intervertebral disc disease by targeting miR-1197/ATP1B3
Source: PubMed Central journal article supplement (PMC8568895; doi:10.1038/s12276-021-00674-z), 2021-10-06
Supplement: 12276_2021_674_MOESM1_ESM.pdf [file 12276_2021_674_MOESM1_ESM.pdf]

*Supplementary Materials*

***circSPG21* protects against intervertebral disc disease by targeting miR-1197/*ATP1B3***

*Yizhen Huang, Zhenlei Zhang, Jianle Wang, Shuying Shen, Teng Yao, Yining Xu, Zizheng Chen, Bin Fang, and Jianjun Ma*

**Supplementary Table 1:**  
**Patient information summary**

**Control**

| <b>Number</b> | <b>Sex</b> | <b>Age (year)</b> | <b>Height (cm)</b> | <b>Weight (kg)</b> | <b>BMI</b> |
|---------------|------------|-------------------|--------------------|--------------------|------------|
| 55xxx06       | Male       | 33                | 170                | 78.5               | 27.16263   |
| 31xxx57       | Female     | 36                | 160                | 51                 | 19.92188   |
| 55xxx18       | Female     | 51                | 152                | 46                 | 19.90997   |

**IVDD**

| <b>Number</b> | <b>Sex</b> | <b>Age (year)</b> | <b>Height (cm)</b> | <b>Weight (kg)</b> | <b>BMI</b> |
|---------------|------------|-------------------|--------------------|--------------------|------------|
| 50xxx96       | Female     | 24                | 156                | 70                 | 28.76397   |
| 30xxx98       | Female     | 32                | 171                | 64                 | 21.88708   |
| 56xxx30       | Male       | 34                | 169                | 58.8               | 20.58751   |
| 55xxx50       | Female     | 42                | 154                | 46                 | 19.39619   |
| 55xxx97       | Male       | 43                | 185                | 80                 | 23.37473   |
| 55xxx95       | Female     | 46                | 160                | 65.6               | 25.625     |
| 56xxx06       | Female     | 47                | 158                | 67.5               | 27.03894   |
| 46xxx90       | Female     | 49                | 160                | 52.5               | 20.50781   |
| 55xxx03       | Female     | 50                | 159                | 75                 | 29.66655   |
| 57xxx35       | Male       | 52                | 168                | 66.85              | 23.68552   |
| 56xxx11       | Male       | 54                | 172                | 68                 | 22.9854    |
| 53xxx50       | Female     | 54                | 160                | 58.5               | 22.85156   |
| 24xxx09       | Female     | 54                | 156                | 61                 | 25.06575   |
| 80xxx03       | Male       | 54                | 155                | 51                 | 21.22789   |
| 54xxx99       | Female     | 55                | 160                | 60                 | 23.4375    |
| 43xxx76       | Male       | 56                | 170                | 73.8               | 25.53633   |
| 56xxx01       | Male       | 56                | 171                | 80                 | 27.35885   |
| 29xxx98       | Female     | 56                | 158                | 59                 | 23.63403   |
| 56xxx56       | Male       | 56                | 171                | 80                 | 27.35885   |
| 56xxx20       | Male       | 56                | 167                | 65                 | 23.30668   |
| 28xxx94       | Female     | 57                | 160                | 60                 | 23.4375    |
| 18xxx67       | Female     | 57                | 157                | 56                 | 22.71897   |
| 81xxx38       | Female     | 60                | 159                | 75                 | 29.66655   |

|         |        |    |     |      |          |
|---------|--------|----|-----|------|----------|
| 56xxx00 | Male   | 60 | 170 | 62   | 21.45329 |
| 56xxx62 | Female | 60 | 146 | 47.6 | 22.33064 |
| 55xxx15 | Female | 62 | 155 | 52   | 21.64412 |
| 56xxx07 | Female | 62 | 160 | 74   | 28.90625 |
| 55xxx78 | Female | 62 | 150 | 55.6 | 24.71111 |
| 56xxx16 | Male   | 63 | 175 | 90   | 29.38776 |
| 36xxx62 | Male   | 63 | 169 | 87   | 30.46112 |
| 56xxx90 | Female | 63 | 158 | 65   | 26.03749 |
| 56xxx35 | Male   | 63 | 168 | 72   | 25.5102  |
| 56xxx88 | Male   | 64 | 175 | 68   | 22.20408 |
| 56xxx43 | Male   | 65 | 160 | 65.5 | 25.58594 |
| 54xxx86 | Male   | 65 | 176 | 62   | 20.0155  |
| 51xxx33 | Female | 66 | 154 | 53   | 22.34778 |
| 20xxx56 | Male   | 67 | 170 | 85   | 29.41176 |
| 54xxx24 | Male   | 68 | 170 | 54   | 18.68512 |
| 32xxx29 | Male   | 69 | 173 | 68   | 22.72044 |
| 55xxx67 | Male   | 70 | 175 | 65   | 21.22449 |
| 55xxx21 | Female | 70 | 158 | 68   | 27.23922 |
| 44xxx05 | Female | 70 | 152 | 41.5 | 17.96226 |
| 36xxx09 | Female | 72 | 155 | 66.5 | 27.6795  |
| 56xxx65 | Male   | 73 | 160 | 75   | 29.29688 |
| 56xxx37 | Male   | 73 | 168 | 69   | 24.44728 |
| 23xxx59 | Male   | 73 | 170 | 65.5 | 22.66436 |
| 80xxx68 | Female | 75 | 158 | 56   | 22.4323  |
| 19xxx68 | Male   | 75 | 172 | 82   | 27.71769 |
| 55xxx44 | Male   | 82 | 168 | 68   | 24.09297 |

**Supplementary Table 2:  
Primer sequence summary**

|                    |                          |
|--------------------|--------------------------|
| circ_0035875 F     | GGGTTATCGCTGATTAACCTCCA  |
| circ_0035875 R     | GGGGAAGTGTACCTCTAAACCA   |
| hsa_circ_0037896 F | TCCTGGGAAAGCTGGAATCAG    |
| hsa_circ_0037896 R | AATTGGCAGCCTGATTGGTCC    |
| hsa_circ_0003258 F | GCACAAACAGTTCATGTGCCA    |
| hsa_circ_0003258 R | AAGGAGTGCACCTTGAGTGA     |
| hsa_circ_0015966 F | TCCGAAGCATCTTAGCCGATG    |
| hsa_circ_0015966 R | TCCTGATCACCCACCAAGTG     |
| hsa_circ_0052612 F | AACTCAGGCATGCTTCTGAC     |
| hsa_circ_0052612 R | GGGGTAGAGACAAACATCATTAAG |
| hsa_circ_0003526 F | GCAATTCCTTCAGTGACACCT    |
| hsa_circ_0003526 R | GGGAACTGTACCTCTAAACCAGT  |
| hsa_circ_0020249 F | TACACCAGGATCCACCCGAT     |
| hsa_circ_0020249 R | TCTTCGCCATCCTCGGTCTA     |
| hsa_circ_0075071 F | TGTTCCCTTTGCTGCCGTAG     |
| hsa_circ_0075071 R | TGCTTTGATCCCATCGAGGTT    |
| hsa_circ_0003638 F | TGAGGACAGCTTGTGAAGGC     |
| hsa_circ_0003638 R | TTCACAAGGAGATTCCCTGGC    |
| hsa_circ_0087275 F | GCTCCTTGTACAACACGCCT     |
| hsa_circ_0087275 R | AAACTCCACACCATGCACCG     |
| hsa_circ_0063865 F | CCCACCCTGCAAGATAACCA     |
| hsa_circ_0063865 R | GCAGGTGCTCCATCAATGC      |
| hsa_circ_0007042 F | GCGTCCTGGTCACCTTCAGA     |
| hsa_circ_0007042 R | ATGGCTCAGTCCCAGGTAGT     |
| hsa_circ_0002089 F | AGGAGCAGCATGGCATTTC      |
| hsa_circ_0002089 R | TCAGAACTGTCTGTGCCACC     |
| hsa_circ_0021535 F | CTGCCGAACAACCAAAGCAA     |
| hsa_circ_0021535 R | AAGTCCATGAACGACCACCC     |
| hsa_circ_0078368 F | ACTACTCTCTGGGTTGGGCA     |
| hsa_circ_0078368 R | TCGCTTTCGAAATGGGTGGT     |
| SPG21 F            | GGTCGCTCTATGACGCGG       |
| SPG21 R            | CGATAACCCGGTAACCCCAT     |
| h-MMP3-F           | CCTACAAGGAGGCAGGCAAG     |
| h-MMP3-R           | CCCGTCACCTCCAATCCAAG     |
| h-MMP13-F          | TCGGCCACTCCTTAGGTCTT     |
| h-MMP13-R          | AAGTGGCTTTTGCCGGTGTA     |
| h-COL2A1-F         | CCAGATGACCTTCCTACGCC     |
| h-COL2A1-R         | TTCAGGGCAGTGTACGTGAAC    |
| h-ADAMTS4 F        | AACGTCAAGGCTCCTCTTGG     |
| h-ADAMTS4 R        | TGACAGGATTGCCGATGCTT     |

|                     |                         |
|---------------------|-------------------------|
| h-ADAMTS5 F         | CCGGAGCCACTGCTTCTATC    |
| h-ADAMTS5 R         | ACCCCCACAGAGGTCAAAGA    |
| h-Aggrecan          | GGGACCTGCAAGGAGACAGAG   |
| h-Aggrecan          | TCAATCTCACACAGGTCCCCTTC |
| h- $\beta$ -actin-F | AGAGCTACGAGCTGCCTGAC    |
| h- $\beta$ -actin-R | AGCACTGTGTTGGCGTACAG    |
| h-SOX9 F            | GCTCTGGAGACTTCTGAACGA   |
| h-SOX9 R            | CCGTTCTTCACCGACTTCCT    |

## Supplementary Figure 1:

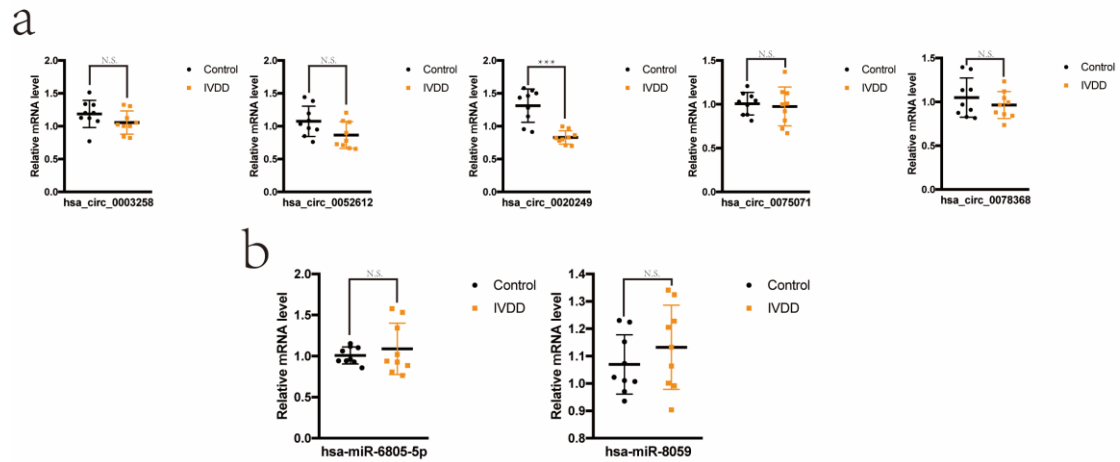

(a) The expression of hsa\_circ\_0003258, hsa\_circ\_0052612, hsa\_circ\_0020249, hsa\_circ\_0075071, hsa\_circ\_0078368, as measured by RT-qPCR, in human degenerated tissue significantly differed from that in the control group;  $n=6$ ,  $***p < 0.001$ . Data are presented as the mean  $\pm$  S.D., and the  $p$ -values were determined by a two-tailed unpaired Student's  $t$ -test. (b) The expression of hsa-miR-6805-5p, hsa-miR-8059, as measured by RT-qPCR, in human degenerated tissue was significantly lower than that in control tissue;  $n=6$ . Data are presented as the mean  $\pm$  S.D., and the  $p$ -values were determined by a two-tailed unpaired Student's  $t$ -test.
